# Supplementary material for: Co-designing community-level integral interventions for active ageing: a systematic review from the lens of community-based participatory research
Source: BMC Public Health. 2024 Mar 1;24:649. doi: 10.1186/s12889-024-18195-5 (PMC10905784; doi:10.1186/s12889-024-18195-5)
Supplement: Supplementary file 3 — Supplementary Material 3. [file 12889_2024_18195_MOESM3_ESM.xlsx]

## Sheet: Types of interventions
Types of integral interventions
Physical activity is the purpose, supported by social environment and technology
A community-based walking programme supported by digital technology (WhatsApp for social participation evaluation, walking app for step count)
A digital display positioned in the public space of a senior neighbourhood to encourage physical movements
A community-led walking programme using activity trackers
A digital group game (Team Bingo) encouraging physical movements in a senior centre
A dancing programme in the neighbourhoods that allows online and offline participation
Social interaction is the purpose, supported by the physical environment and technology
A community for sharing, learning and managing music using digital technology where people can also meet face-to-face
A community for radio creation where people meet face-to-face and some use technology (2 studies)
The creation of a makerspace: a public place where people get together to make things (with technology)
A social prescribing service for a community supported by digital technology where people can meet face-to-face
A system for managing the use of public space for social activities in a retirement village
Technology is the purpose, supported by the physical and social environment
A community formed by older adults to learn technology from each other at a physical meeting point
A social learning environment for the use and adoption of technology in neighbourhoods where people can meet face-to-face

## Sheet: Design considerations
Additional file 3: An overview of the categories, design considerations and example evidence (coding scheme)
Categories (themes)	Design considerations (sub-themes)	Example evidence from the reviewed articles (for contextualizing the design considerations)	Source of the example evidence
Community: if the intervention recognized the community as a unit of identity ​	Recruit participants* via the commonly-used channels that are specific to the target community	This event was promoted through several channels: verbally by the project team at six different local events for elderly people, by a newspaper advertisement, by distribution of 1000 flyers(directly into mailboxes in elderly homes, provided at events, handed out to health care professionals and stakeholders), and by an advertisement displayed in the window of a centrally located pharmacy	Frei et al. (2019)
	Understand the values and norms of the community	To learn how seniors socially interact with each other in the community center, and how they motivate themselves to participate in the routine game plays, we started our design process by conducting observations and interviews at the center.	Yang et al. (2020)
	Enable connections among stakeholders* of the community	Meeting places of the group walks were displayed and to a messenger app (WhatsApp) to enable communication between participants	Frei et al. (2019)
Resources: if the intervention was making use of the resources that the community already have	Understand the history and politics of resource allocation within the community	Although the process that we describe is older-adult driven, staff and management played a key role, for example, making the final decision on space allocation. Having a staff member in the committee helped with some aspects, such as hosting demos, but was sometimes viewed with light skepticism or even resistance when residents described management decisions with which they disagreed.	Lazar et al. (2021)
	Utilise physical resources of the community	Make use of existing walking trails in the neighbourhood when designing the walking activity	Frei et al. (2019)
	Utilise social resources of the community	Beyond the committee, some residents supported the makerspace initiative through donations and expertise	Lazar et al. (2021)
Collaboration: if all stakeholders worked together to develop this intervention throughout	Co-design the intervention with key stakeholders	The findings and discussion will illustrate the evolution of the multimodal program delivery as it adapted through live stream, prerecorded stream, and blended in-person stream modes in response to challenges and feedback from program participants including community administrators, older adults, people living with dementia, and family carers, volunteers, and staff facilitators	Kosurko et al. (2022)
	Match the level of co-design based on the shared goals of stakeholders	Residents feel powerlessness when the management team decide on re-purposing the common space into a makersapce without consulting them first.	Lazar et al. (2021)
	Help stakeholders to envision future scenarios	Five storyboard scenarios were developed to scaffold the conversation, older adults and community workers were encouraged to develop their own storyboards.	Gooch et al. (2021)
Mutual benefits: if all stakeholders gained benefits from the intervention	Help participants concretise the benefits of the intervention in their daily lives	During baseline visit 2, the study team discussed with them individual and specific benefit of being more physically active and agreed on short- and long-term step goals.	Frei et al. (2019)
	Uncover reasons behind tension among stakeholders (if any)	The first of two co-design workshops ran for 2 hours and explored why tensioned relationships exist within residential parks. The role of the park manager was highlighted as a problematic issue, prompting the domain experts to build an abstract representation of their park manager using arts and craft materials.	Keirnan et al. (2019)
	Clarify whose interests the stakeholders represent	Understanding that individuals maybe speaking for others makes it key to unravel who is speaking for whom and to determine whether these imagined others indeed exist and have interests as predicted.	Lazar et al. (2021)
Co-learning: if the intervention provided suitable education and training and allow knowledge exchange	Facilitate learning between communities with similar interests	In 2019, we hosted a radio festival to explore the potential of creating a network that connects our different research collaborators and other groups of older adults who create radio content.	Reuter et al. (2020)
	Scaffold education and training based on the current knowledge, preferences and experiences of participants	A better path may be to first understand individuals’attitudes and experience with the topic of interest and then provide information and scaffolding to guide the participant through sharing their ideas within the bounds of the research and technical constraints of the project.	Lazar et al. (2021)
	Cultivate a collaborative learning culture in the community	The older adults only felt comfortable helping each other with technology when an officially designated “technology helper” was in the room that they could turn to if and when obstacles arose.	Lenstra et al. (2017)
Flexibility: if the intervention was developed gradually with feedback cycles​	Start small and set milestones to track the progress	pilot test was conducted to evaluate the storyboards; and the workshops were conducted to collect feedback from stakeholders to inform the design of the display	Gooch et al. (2021)
	Collect feedback and ideas from key stakeholders regularly and iterate when needed	All three workshops were designed for the results to cascade into the next, ensuring the co-design process was open and flexible.	Pedell et al. (2021)
	Understand the reasons for dropping out	Other reasons participants wouldnot continue using a tracker were related to the usability of the device or the specific modelused in this walking programme, specifically, not being able to consistently operate thedevice or feeling frustrated that the tracker could only capture steps and not other physicalmovements completed by participants	O' Brien et al. (2021)
Inclusion: if the intervention has considered a wide range of physical, cognitive, socio-economical, cultural factors and personalities of participants	Know what technologies the participants are familiar with (have both technical and non-technical options for participants if needed)	The approach she and the committee came up with was to purchase two self-threading machines. One machine would be for individuals who felt more comfortable with technology. For the other, “we found one that’s just slightly high tech,and we thought that we could put a sign on it that says,‘leave on straight stitch,if you want anything fancy move on to the next sewing machine.”’	Lazar et al. (2021)
	Uncover and tailor to the diversity of participants	The effectiveness of self-monitoring to bring about behaviour change in older adults is likely dependent on self-awareness or the previous engagement of the individual with self-tracking their exercise, as well as whether they are more intrinsically or extrinsically motivated.	O' Brien et al. (2021)
	Recognise any ageism views hold by the stakeholders and researchers themselves	So when I came out of hospital, I was quite suprised "would you like to come?", I thought, "Crikey, they still want me at my age!"	Lenstra et al. (2017)
Dissemination: if the intervention and knowledge gained are communicated to all stakeholders	Provide periodical findings to stakeholders	Monthly, the study team arranged informal group get-togethers where participants could meet for informal exchange with each other and the study team.	Frei et al. (2019)
	Train the responsible person(s) for intervention handover in sufficient time	Five months before the last participant completed the 6-month follow-up assessment, a study team member began to transfer responsibility for the walking groups to three key persons. These three leaders were empowered to sustain the intervention in the long term. Support in the initial phase was provided for (1) transfer of organization skills, technical know-how, user rights and new channels to p…	Frei et al. (2019)
	Create a practical guide to help communities implement the intervention	The results provided information for the development of a guidance manual to implement the CAPACITY intervention in other Swiss cities.	Frei et al. (2019)
*with participants, we mean people who will participate in the intervention, in our case, they are older adults.	*with stakeholders, we mean not only participants but also people which helped with organising and maintaining the intervention, or are key for creating the right conditions (for instance decission makers)
Reflecting on the eight categories, the design considerations from all categories contribute to the design of the social elements of an integral intervention, followed by the digital elements (i.e., collaboration, mutual benefits, co-learning, flexibility, inclusion, and dissemination), and only four categories take the physical elements into account (i.e., resources, flexibility, inclusion, and …
